# Supplementary material for: Dietary Patterns Are Associated with the Gut Microbiome and Metabolic Syndrome in Mexican Postmenopausal Women
Source: Nutrients. 2023 Nov 7;15(22):4704. doi: 10.3390/nu15224704 (PMC10675332; doi:10.3390/nu15224704)
Supplement: Supplementary file 1 [file nutrients-15-04704-s001.zip › supplementals 2.xlsx]

## Sheet: Supplemental Table S6
Supplementary Table S6. Spearman correlations of relative genera abundance with MetS risk indicators.
Genus	Glucose			TG			HDL-C			SBP			DBP			WC
	Rho	p	q	Rho	p	q	Rho	p	q	Rho	p	q	Rho	p	q	Rho	p	q
g__Butyricicoccus	0.042	0.656	0.714	0.201	0.031	0.103	-0.163	0.08	0.157	0.186	0.045	0.113	0.14	0.134	0.21	0.132	0.158	0.228
g__Lactobacillus	0.287	0.002	0.032	0.016	0.868	0.868	-0.162	0.082	0.157	0.183	0.049	0.113	0.036	0.705	0.757	0.256	0.006	0.048
g__Negativibacillus	0.112	0.233	0.297	0.032	0.736	0.774	-0.101	0.283	0.336	0.17	0.068	0.148	0.021	0.826	0.842	0.144	0.123	0.195
g__Roseburia	0.185	0.047	0.113	0.201	0.031	0.103	-0.207	0.026	0.098	0.244	0.008	0.052	0.145	0.121	0.195	0.346	0.0001	0.015
g__Allisonella	0.126	0.179	0.253	0.116	0.215	0.277	-0.152	0.104	0.18	0.133	0.156	0.228	0.196	0.035	0.104	0.258	0.005	0.048
g__[Eubacterium] siraeum group	-0.256	0.006	0.048	-0.086	0.359	0.416	0.084	0.369	0.422	-0.108	0.247	0.307	-0.161	0.084	0.157	-0.204	0.028	0.102
g__Barnesiella	-0.119	0.204	0.273	-0.101	0.28	0.336	-0.033	0.728	0.773	-0.132	0.157	0.228	-0.294	0.001	0.032	-0.042	0.658	0.714
g__Christensenellaceae R-7 group	-0.26	0.005	0.048	-0.145	0.12	0.195	0.134	0.152	0.228	-0.185	0.047	0.113	-0.152	0.104	0.18	-0.246	0.008	0.052
g__Clostridia UCG-014	-0.208	0.025	0.098	-0.199	0.032	0.103	0.145	0.119	0.195	-0.192	0.039	0.105	-0.109	0.242	0.305	-0.236	0.011	0.057
g__Gastranaerophilales	-0.259	0.005	0.048	-0.159	0.087	0.159	0.166	0.076	0.157	-0.242	0.009	0.052	-0.249	0.007	0.052	-0.184	0.048	0.113
g__Howardella	-0.304	0.001	0.032	-0.209	0.024	0.098	0.263	0.004	0.048	-0.289	0.002	0.032	-0.161	0.085	0.157	-0.195	0.036	0.104
g__Lachnospiraceae UCG-003	-0.285	0.002	0.032	-0.166	0.074	0.157	0.193	0.038	0.104	-0.213	0.022	0.098	-0.209	0.024	0.098	-0.216	0.02	0.097
g__Oscillibacter	-0.182	0.05	0.113	-0.117	0.212	0.277	0.029	0.758	0.781	-0.227	0.014	0.072	-0.241	0.009	0.052	-0.133	0.155	0.228
g__UCG-005	-0.243	0.009	0.052	-0.062	0.51	0.565	0.083	0.374	0.424	-0.118	0.206	0.273	-0.199	0.032	0.103	-0.121	0.196	0.27
g__RF39	-0.186	0.046	0.113	-0.161	0.084	0.157	0.125	0.182	0.254	-0.146	0.118	0.195	-0.207	0.026	0.098	-0.194	0.037	0.104
g__Alistipes	-0.164	0.079	0.157	-0.071	0.452	0.506	-0.019	0.836	0.845	-0.119	0.202	0.273	-0.198	0.033	0.103	-0.135	0.147	0.228
g__Bacteroides	-0.105	0.263	0.323	-0.093	0.322	0.378	-0.03	0.748	0.778	-0.153	0.1	0.179	-0.178	0.057	0.125	-0.103	0.271	0.329
q-values were calculated using FDR correction.
TG, Triglycerides; HDL-C, High-cholesterol lipoprotein cholesterol; SBP, Systolic blood pressure; DBP, Diastolic blood pressure; WC, Waist circumference; p, p-value; q, q-value.

## Sheet: Supplemental Table S7
Supplemental Table S7. Spearman correlations of relative genera abundance with nutritional traits and macronutrients.
Genus	“Healthy” pattern			“Unhealthy” pattern			“Protein” pattern			Total Energy			Carbohydrates			Protein			Fats			Physical Activity
	Rho	p	q	Rho	p	q	Rho	p	q	Rho	p	q	Rho	p	q	Rho	p	q	Rho	p	q	Rho	p	q
g__Butyricicoccus	-0.002	0.985	0.988	-0.005	0.958	0.988	0.116	0.231	0.959	0.095	0.327	0.959	-0.047	0.632	0.959	0.021	0.831	0.984	0.075	0.443	0.959	0.01	0.916	0.988
g__Lactobacillus	0.065	0.503	0.959	0.05	0.606	0.959	0.234	0.015	0.78	0.26	0.007	0.78	-0.131	0.177	0.959	0.072	0.458	0.959	0.155	0.109	0.959	0.028	0.773	0.984
g__Negativibacillus	-0.229	0.017	0.78	0.045	0.644	0.959	-0.093	0.339	0.959	0.004	0.971	0.988	0.003	0.975	0.988	0.004	0.963	0.988	0.022	0.825	0.984	-0.005	0.962	0.988
g__Roseburia	-0.063	0.514	0.959	0.05	0.605	0.959	-0.09	0.354	0.959	0.036	0.708	0.984	-0.165	0.088	0.959	0.063	0.516	0.959	0.193	0.046	0.959	0.004	0.965	0.988
g__Allisonella	-0.092	0.341	0.959	0.128	0.186	0.959	0.174	0.072	0.959	0.045	0.645	0.959	-0.095	0.327	0.959	0.103	0.289	0.959	0.087	0.373	0.959	-0.02	0.832	0.984
g__[Eubacterium] siraeum group	0.137	0.156	0.959	0.089	0.357	0.959	-0.159	0.099	0.959	0.003	0.975	0.988	0.084	0.387	0.959	-0.118	0.222	0.959	-0.058	0.548	0.959	-0.04	0.676	0.959
g__Barnesiella	0.071	0.464	0.959	-0.09	0.353	0.959	-0.006	0.954	0.988	0.042	0.663	0.959	-0.146	0.133	0.959	0.143	0.141	0.959	0.131	0.177	0.959	0.021	0.826	0.984
g__Christensenellaceae R-7 group	0.078	0.42	0.959	-0.026	0.789	0.984	-0.098	0.314	0.959	0.02	0.84	0.985	-0.041	0.677	0.959	-0.028	0.774	0.984	0.07	0.473	0.959	-0.06	0.53	0.959
g__Clostridia UCG-014	0.172	0.075	0.959	0.082	0.401	0.959	-0.005	0.963	0.988	0.024	0.804	0.984	-0.08	0.408	0.959	-0.047	0.631	0.959	0.119	0.218	0.959	0.056	0.56	0.959
g__Gastranaerophilales	0.064	0.513	0.959	0.121	0.212	0.959	-0.146	0.131	0.959	-0.117	0.229	0.959	0.023	0.815	0.984	-0.001	0.988	0.988	-0.012	0.902	0.988	0.208	0.029	0.959
g__Howardella	-0.027	0.779	0.984	0.067	0.494	0.959	-0.004	0.967	0.988	0.035	0.718	0.984	0.068	0.487	0.959	-0.029	0.763	0.984	-0.077	0.428	0.959	-0.067	0.485	0.959
g__Lachnospiraceae UCG-003	0.009	0.925	0.988	0.087	0.372	0.959	-0.053	0.582	0.959	-0.015	0.875	0.988	0.071	0.464	0.959	-0.027	0.779	0.984	-0.064	0.511	0.959	-0.058	0.543	0.959
g__Oscillibacter	0.065	0.505	0.959	0.071	0.467	0.959	0.042	0.664	0.959	-0.092	0.343	0.959	0.042	0.666	0.959	-0.024	0.805	0.984	-0.031	0.751	0.984	0.067	0.482	0.959
g__UCG-005	0.066	0.5	0.959	0.043	0.658	0.959	-0.09	0.353	0.959	-0.003	0.978	0.988	-0.051	0.599	0.959	-0.049	0.611	0.959	0.091	0.348	0.959	-0.015	0.873	0.988
g__RF39	0.164	0.091	0.959	-0.049	0.614	0.959	-0.105	0.28	0.959	0.116	0.23	0.959	0.01	0.915	0.988	-0.087	0.373	0.959	0.03	0.757	0.984	-0.05	0.605	0.959
g__Alistipes	0.143	0.139	0.959	0.051	0.601	0.959	-0.084	0.385	0.959	-0.104	0.285	0.959	0.095	0.328	0.959	-0.12	0.215	0.959	-0.076	0.435	0.959	-0.022	0.815	0.984
g__Bacteroides	0.06	0.541	0.959	-0.069	0.479	0.959	-0.024	0.803	0.984	-0.153	0.115	0.959	0.056	0.565	0.959	0.009	0.927	0.988	-0.088	0.366	0.959	0.136	0.154	0.959
q-values were calculated using FDR correction.
TG, Triglycerides; HDL-C, High-cholesterol lipoprotein cholesterol; SBP, Systolic blood pressure; DBP, Diastolic blood pressure; WC, Waist circumference; p, p-value; q, q-value.

## Sheet: Supplemental Table S8
Supplemental Table S8. Association of microbiota abundance with MetS risk indicators and nutritional traits
Genus	Trait	Coefficient	p-value	q-value
g__[Eubacterium] siraeum group	Glucose	0.359902	0.463439	0.932397
g__Alistipes	Glucose	-0.160359	0.644645	0.932397
g__Allisonella	Glucose	0.0214144	0.955519	0.990477
g__Bacteroides	Glucose	-0.0332875	0.867637	0.983322
g__Barnesiella	Glucose	-1.16006	0.0345389	0.535074
g__Butyricicoccus	Glucose	0.609115	0.123171	0.590577
g__Christensenellaceae R-7 group	Glucose	-0.407708	0.355167	0.914823
g__Clostridia UCG-014	Glucose	-0.219467	0.719874	0.932397
g__Gastranaerophilales	Glucose	-0.184393	0.719642	0.932397
g__Howardella	Glucose	-0.492005	0.176763	0.630666
g__Lachnospiraceae UCG-003	Glucose	0.0460449	0.819388	0.980957
g__Lactobacillus	Glucose	-0.0486628	0.920817	0.990477
g__Negativibacillus	Glucose	0.485576	0.14902	0.630666
g__Oscillibacter	Glucose	0.118433	0.736799	0.932397
g__RF39	Glucose	-1.03372	0.0807134	0.535074
g__Roseburia	Glucose	0.0947152	0.775344	0.941489
g__UCG-005	Glucose	-0.271878	0.538512	0.932397
g__[Eubacterium] siraeum group	TG (mg/dL)	0.49172	0.172277	0.795907
g__Alistipes	TG (mg/dL)	0.00224686	0.992976	0.992976
g__Allisonella	TG (mg/dL)	0.194968	0.487491	0.921403
g__Bacteroides	TG (mg/dL)	-0.117274	0.424643	0.921403
g__Barnesiella	TG (mg/dL)	-0.543185	0.181477	0.795907
g__Butyricicoccus	TG (mg/dL)	0.573547	0.0479579	0.610391
g__Christensenellaceae R-7 group	TG (mg/dL)	0.0608659	0.851553	0.983365
g__Clostridia UCG-014	TG (mg/dL)	-0.144662	0.746851	0.933564
g__Gastranaerophilales	TG (mg/dL)	-0.345612	0.35739	0.921403
g__Howardella	TG (mg/dL)	-0.358695	0.179776	0.795907
g__Lachnospiraceae UCG-003	TG (mg/dL)	-0.055538	0.707056	0.921403
g__Lactobacillus	TG (mg/dL)	-0.343422	0.339223	0.921403
g__Negativibacillus	TG (mg/dL)	-0.14927	0.5482	0.921403
g__Oscillibacter	TG (mg/dL)	-0.131628	0.61086	0.921403
g__RF39	TG (mg/dL)	-0.193186	0.658836	0.921403
g__Roseburia	TG (mg/dL)	0.10261	0.674365	0.921403
g__UCG-005	TG (mg/dL)	0.24515	0.449305	0.921403
g__[Eubacterium] siraeum group	C-HDL (mg/dL)	-0.0573208	0.877487	0.962054
g__Alistipes	C-HDL (mg/dL)	-0.304898	0.242764	0.766881
g__Allisonella	C-HDL (mg/dL)	-0.208765	0.469327	0.895039
g__Bacteroides	C-HDL (mg/dL)	-0.155838	0.298946	0.847014
g__Barnesiella	C-HDL (mg/dL)	-0.244943	0.557372	0.895039
g__Butyricicoccus	C-HDL (mg/dL)	-0.700259	0.0177149	0.339856
g__Christensenellaceae R-7 group	C-HDL (mg/dL)	-0.24499	0.461103	0.895039
g__Clostridia UCG-014	C-HDL (mg/dL)	0.457402	0.319527	0.863861
g__Gastranaerophilales	C-HDL (mg/dL)	0.36081	0.349729	0.874322
g__Howardella	C-HDL (mg/dL)	0.612683	0.0242188	0.343099
g__Lachnospiraceae UCG-003	C-HDL (mg/dL)	0.0187545	0.901727	0.962054
g__Lactobacillus	C-HDL (mg/dL)	-0.136139	0.71187	0.91347
g__Negativibacillus	C-HDL (mg/dL)	-0.32345	0.20245	0.762976
g__Oscillibacter	C-HDL (mg/dL)	-0.0952403	0.72003	0.91347
g__RF39	C-HDL (mg/dL)	0.571929	0.200701	0.762976
g__Roseburia	C-HDL (mg/dL)	-0.523928	0.0341397	0.353514
g__UCG-005	C-HDL (mg/dL)	-0.164115	0.622937	0.91347
g__[Eubacterium] siraeum group	SBP (mmHg)	-0.00778291	0.98548	0.991253
g__Alistipes	SBP (mmHg)	-0.0200871	0.947066	0.991253
g__Allisonella	SBP (mmHg)	0.366634	0.259275	0.64008
g__Bacteroides	SBP (mmHg)	-0.0194694	0.911232	0.980439
g__Barnesiella	SBP (mmHg)	-0.989515	0.0374789	0.4551
g__Butyricicoccus	SBP (mmHg)	0.579935	0.0933546	0.503452
g__Christensenellaceae R-7 group	SBP (mmHg)	-0.158307	0.681085	0.889471
g__Clostridia UCG-014	SBP (mmHg)	-0.579382	0.263562	0.64008
g__Gastranaerophilales	SBP (mmHg)	-0.856575	0.0474811	0.503452
g__Howardella	SBP (mmHg)	-0.750832	0.0163451	0.362447
g__Lachnospiraceae UCG-003	SBP (mmHg)	-0.378783	0.0255845	0.362447
g__Lactobacillus	SBP (mmHg)	0.538603	0.204847	0.600413
g__Negativibacillus	SBP (mmHg)	0.496489	0.0892621	0.503452
g__Oscillibacter	SBP (mmHg)	-0.139816	0.649354	0.889471
g__RF39	SBP (mmHg)	-0.560815	0.274998	0.649302
g__Roseburia	SBP (mmHg)	0.677751	0.0175048	0.362447
g__UCG-005	SBP (mmHg)	0.071861	0.851795	0.940293
g__[Eubacterium] siraeum group	DBP (mmHg)	0.0462415	0.897087	0.95343
g__Alistipes	DBP (mmHg)	-0.100328	0.691193	0.917638
g__Allisonella	DBP (mmHg)	0.235249	0.396861	0.887716
g__Bacteroides	DBP (mmHg)	0.0949325	0.513335	0.903286
g__Barnesiella	DBP (mmHg)	-1.01594	0.010585	0.449862
g__Butyricicoccus	DBP (mmHg)	0.598636	0.0365617	0.517958
g__Christensenellaceae R-7 group	DBP (mmHg)	-0.141333	0.660079	0.917638
g__Clostridia UCG-014	DBP (mmHg)	-0.498812	0.259223	0.736889
g__Gastranaerophilales	DBP (mmHg)	-0.683062	0.0642888	0.536906
g__Howardella	DBP (mmHg)	-0.495344	0.0599	0.536906
g__Lachnospiraceae UCG-003	DBP (mmHg)	-0.278994	0.0542596	0.536906
g__Lactobacillus	DBP (mmHg)	0.0101196	0.977334	0.977334
g__Negativibacillus	DBP (mmHg)	-0.0167389	0.945759	0.957018
g__Oscillibacter	DBP (mmHg)	-0.204501	0.424196	0.897614
g__RF39	DBP (mmHg)	-0.808274	0.0595645	0.536906
g__Roseburia	DBP (mmHg)	0.388747	0.105397	0.536906
g__UCG-005	DBP (mmHg)	-0.281043	0.38041	0.873915
g__[Eubacterium] siraeum group	WC (cm)	-0.625752	0.124869	0.58966
g__Alistipes	WC (cm)	-0.187236	0.515234	0.893773
g__Allisonella	WC (cm)	0.444183	0.155669	0.635859
g__Bacteroides	WC (cm)	-0.0110214	0.946344	0.970838
g__Barnesiella	WC (cm)	0.247146	0.587107	0.897508
g__Butyricicoccus	WC (cm)	0.92467	0.00376251	0.106605
g__Christensenellaceae R-7 group	WC (cm)	-0.194093	0.591888	0.897508
g__Clostridia UCG-014	WC (cm)	-0.586249	0.240632	0.68176
g__Gastranaerophilales	WC (cm)	-0.676319	0.105774	0.58966
g__Howardella	WC (cm)	-0.320947	0.283196	0.731321
g__Lachnospiraceae UCG-003	WC (cm)	-0.102768	0.535631	0.897047
g__Lactobacillus	WC (cm)	0.268215	0.503401	0.89144
g__Negativibacillus	WC (cm)	0.501551	0.068074	0.578629
g__Oscillibacter	WC (cm)	-0.0223126	0.93934	0.970838
g__RF39	WC (cm)	-0.67609	0.164655	0.635859
g__Roseburia	WC (cm)	0.892163	0.000742041	0.0630735
g__UCG-005	WC (cm)	-0.0589642	0.873071	0.951423
g__[Eubacterium] siraeum group	"Healthy" pattern	0.413	0.215666	0.764108
g__Alistipes	"Healthy" pattern	0.301177	0.201485	0.764108
g__Allisonella	"Healthy" pattern	-0.0605639	0.817282	0.977777
g__Bacteroides	"Healthy" pattern	0.00379968	0.977777	0.977777
g__Barnesiella	"Healthy" pattern	0.250253	0.508556	0.947637
g__Butyricicoccus	"Healthy" pattern	-0.189259	0.485098	0.947637
g__Christensenellaceae R-7 group	"Healthy" pattern	-0.0963259	0.749511	0.965279
g__Clostridia UCG-014	"Healthy" pattern	0.57267	0.168706	0.764108
g__Gastranaerophilales	"Healthy" pattern	-0.163597	0.640887	0.947637
g__Howardella	"Healthy" pattern	-0.0377487	0.879911	0.977777
g__Lachnospiraceae UCG-003	"Healthy" pattern	-0.102638	0.454927	0.947637
g__Lactobacillus	"Healthy" pattern	0.149424	0.65474	0.947637
g__Negativibacillus	"Healthy" pattern	-0.488062	0.0326115	0.461996
g__Oscillibacter	"Healthy" pattern	-0.157838	0.510602	0.947637
g__RF39	"Healthy" pattern	0.542163	0.181117	0.764108
g__Roseburia	"Healthy" pattern	-0.311188	0.167826	0.764108
g__UCG-005	"Healthy" pattern	0.10419	0.72902	0.953334
g__[Eubacterium] siraeum group	"Unhealthy" pattern	0.33924	0.317897	0.823052
g__Alistipes	"Unhealthy" pattern	0.251305	0.293081	0.823052
g__Allisonella	"Unhealthy" pattern	0.602765	0.0204803	0.352974
g__Bacteroides	"Unhealthy" pattern	-0.228994	0.092614	0.592518
g__Barnesiella	"Unhealthy" pattern	-0.276351	0.467586	0.845634
g__Butyricicoccus	"Unhealthy" pattern	0.177566	0.514755	0.892943
g__Christensenellaceae R-7 group	"Unhealthy" pattern	0.245148	0.418261	0.844587
g__Clostridia UCG-014	"Unhealthy" pattern	0.412947	0.324604	0.823052
g__Gastranaerophilales	"Unhealthy" pattern	0.329939	0.348587	0.823052
g__Howardella	"Unhealthy" pattern	-0.116652	0.642199	0.901738
g__Lachnospiraceae UCG-003	"Unhealthy" pattern	0.13604	0.325629	0.823052
g__Lactobacillus	"Unhealthy" pattern	0.519045	0.120233	0.681321
g__Negativibacillus	"Unhealthy" pattern	0.27195	0.240121	0.823052
g__Oscillibacter	"Unhealthy" pattern	0.233545	0.335305	0.823052
g__RF39	"Unhealthy" pattern	0.136462	0.738822	0.926596
g__Roseburia	"Unhealthy" pattern	0.272718	0.230432	0.823052
g__UCG-005	"Unhealthy" pattern	0.0981381	0.747774	0.926596
g__[Eubacterium] siraeum group	"Protein" pattern	-0.543461	0.121556	0.728588
g__Alistipes	"Protein" pattern	-0.133924	0.590395	0.933338
g__Allisonella	"Protein" pattern	0.218318	0.425493	0.932699
g__Bacteroides	"Protein" pattern	0.061124	0.668445	0.933338
g__Barnesiella	"Protein" pattern	0.298378	0.451293	0.932699
g__Butyricicoccus	"Protein" pattern	0.0750065	0.791738	0.933338
g__Christensenellaceae R-7 group	"Protein" pattern	-0.283362	0.368739	0.932699
g__Clostridia UCG-014	"Protein" pattern	0.227759	0.602396	0.933338
g__Gastranaerophilales	"Protein" pattern	-0.353341	0.334883	0.932699
g__Howardella	"Protein" pattern	-0.133359	0.609897	0.933338
g__Lachnospiraceae UCG-003	"Protein" pattern	0.122711	0.394312	0.932699
g__Lactobacillus	"Protein" pattern	0.264833	0.448487	0.932699
g__Negativibacillus	"Protein" pattern	-0.438755	0.067812	0.59914
g__Oscillibacter	"Protein" pattern	0.218007	0.387679	0.932699
g__RF39	"Protein" pattern	-0.333899	0.432789	0.932699
g__Roseburia	"Protein" pattern	-0.216277	0.361369	0.932699
g__UCG-005	"Protein" pattern	-0.3614	0.253597	0.932699
g__[Eubacterium] siraeum group	Total energy (kcal)	0.157511	0.644466	0.946818
g__Alistipes	Total energy (kcal)	-0.0463362	0.846927	0.986535
g__Allisonella	Total energy (kcal)	0.344103	0.190045	0.745706
g__Bacteroides	Total energy (kcal)	-0.246159	0.0708788	0.616907
g__Barnesiella	Total energy (kcal)	0.0927987	0.807772	0.98559
g__Butyricicoccus	Total energy (kcal)	0.354659	0.192612	0.745706
g__Christensenellaceae R-7 group	Total energy (kcal)	0.344912	0.254883	0.761822
g__Clostridia UCG-014	Total energy (kcal)	0.183601	0.6622	0.946818
g__Gastranaerophilales	Total energy (kcal)	-0.389072	0.268878	0.761822
g__Howardella	Total energy (kcal)	0.17233	0.492744	0.946818
g__Lachnospiraceae UCG-003	Total energy (kcal)	0.00568678	0.967351	0.988298
g__Lactobacillus	Total energy (kcal)	0.61995	0.0633273	0.616907
g__Negativibacillus	Total energy (kcal)	0.0173872	0.940402	0.986842
g__Oscillibacter	Total energy (kcal)	-0.0121709	0.960157	0.988298
g__RF39	Total energy (kcal)	0.141755	0.729389	0.961376
g__Roseburia	Total energy (kcal)	0.296343	0.192387	0.745706
g__UCG-005	Total energy (kcal)	0.274248	0.370054	0.946818
g__[Eubacterium] siraeum group	Carbohydrates (%)	0.0816434	0.816079	0.92489
g__Alistipes	Carbohydrates (%)	0.248717	0.316535	0.901158
g__Allisonella	Carbohydrates (%)	-0.202205	0.462802	0.901158
g__Bacteroides	Carbohydrates (%)	0.0391968	0.784687	0.919404
g__Barnesiella	Carbohydrates (%)	-0.617283	0.119198	0.675457
g__Butyricicoccus	Carbohydrates (%)	-0.359544	0.206141	0.761827
g__Christensenellaceae R-7 group	Carbohydrates (%)	-0.316715	0.317235	0.901158
g__Clostridia UCG-014	Carbohydrates (%)	-0.664845	0.128331	0.681759
g__Gastranaerophilales	Carbohydrates (%)	-0.194818	0.597373	0.901158
g__Howardella	Carbohydrates (%)	0.128805	0.62386	0.901158
g__Lachnospiraceae UCG-003	Carbohydrates (%)	-0.0375002	0.795332	0.919404
g__Lactobacillus	Carbohydrates (%)	-0.192426	0.583993	0.901158
g__Negativibacillus	Carbohydrates (%)	0.0794317	0.74366	0.919404
g__Oscillibacter	Carbohydrates (%)	0.0335094	0.894311	0.931001
g__RF39	Carbohydrates (%)	-0.108284	0.800422	0.919404
g__Roseburia	Carbohydrates (%)	-0.482564	0.040898	0.534565
g__UCG-005	Carbohydrates (%)	-0.2076	0.510491	0.901158
g__[Eubacterium] siraeum group	Protein (%)	-0.328527	0.339588	0.902031
g__Alistipes	Protein (%)	-0.355265	0.143603	0.871875
g__Allisonella	Protein (%)	0.00307455	0.990906	0.990906
g__Bacteroides	Protein (%)	0.184803	0.186509	0.87313
g__Barnesiella	Protein (%)	0.459787	0.236995	0.87313
g__Butyricicoccus	Protein (%)	-0.0549872	0.844093	0.987838
g__Christensenellaceae R-7 group	Protein (%)	-0.103221	0.739761	0.987838
g__Clostridia UCG-014	Protein (%)	0.0767729	0.858324	0.987838
g__Gastranaerophilales	Protein (%)	0.36165	0.315325	0.902031
g__Howardella	Protein (%)	-0.0475812	0.85324	0.987838
g__Lachnospiraceae UCG-003	Protein (%)	0.139922	0.321928	0.902031
g__Lactobacillus	Protein (%)	-0.304578	0.375433	0.938582
g__Negativibacillus	Protein (%)	-0.141554	0.551459	0.987838
g__Oscillibacter	Protein (%)	0.0994929	0.687478	0.987838
g__RF39	Protein (%)	-0.308592	0.461011	0.987838
g__Roseburia	Protein (%)	0.0145612	0.950275	0.990906
g__UCG-005	Protein (%)	-0.200581	0.517385	0.987838
g__[Eubacterium] siraeum group	Fat (%)	0.0461241	0.89407	0.944635
g__Alistipes	Fat (%)	-0.146537	0.550092	0.869435
g__Allisonella	Fat (%)	0.245659	0.36548	0.869435
g__Bacteroides	Fat (%)	-0.129844	0.357851	0.869435
g__Barnesiella	Fat (%)	0.549914	0.15983	0.674586
g__Butyricicoccus	Fat (%)	0.463515	0.0974459	0.598423
g__Christensenellaceae R-7 group	Fat (%)	0.432591	0.165009	0.674586
g__Clostridia UCG-014	Fat (%)	0.778061	0.0705282	0.598423
g__Gastranaerophilales	Fat (%)	0.0770971	0.832274	0.944635
g__Howardella	Fat (%)	-0.136197	0.599066	0.869435
g__Lachnospiraceae UCG-003	Fat (%)	-0.0167137	0.906662	0.944635
g__Lactobacillus	Fat (%)	0.370062	0.284614	0.834214
g__Negativibacillus	Fat (%)	-0.0342361	0.886388	0.944635
g__Oscillibacter	Fat (%)	-0.0850043	0.732424	0.902261
g__RF39	Fat (%)	0.268887	0.524107	0.869435
g__Roseburia	Fat (%)	0.583675	0.0116628	0.301559
g__UCG-005	Fat (%)	0.34156	0.271306	0.823608
g__[Eubacterium] siraeum group	Physical activity (h/w)	0.159893	0.631259	0.958836
g__Alistipes	Physical activity (h/w)	0.0941953	0.689526	0.958836
g__Allisonella	Physical activity (h/w)	0.0101094	0.9691	0.980637
g__Bacteroides	Physical activity (h/w)	0.106815	0.430785	0.958836
g__Barnesiella	Physical activity (h/w)	0.247954	0.510537	0.958836
g__Butyricicoccus	Physical activity (h/w)	0.0515243	0.848747	0.980637
g__Christensenellaceae R-7 group	Physical activity (h/w)	0.0361566	0.90419	0.980637
g__Clostridia UCG-014	Physical activity (h/w)	0.170523	0.681829	0.958836
g__Gastranaerophilales	Physical activity (h/w)	0.929919	0.00671812	0.190347
g__Howardella	Physical activity (h/w)	-0.139671	0.574151	0.958836
g__Lachnospiraceae UCG-003	Physical activity (h/w)	-0.182294	0.181625	0.884835
g__Lactobacillus	Physical activity (h/w)	0.0733423	0.82555	0.980637
g__Negativibacillus	Physical activity (h/w)	0.182266	0.427209	0.958836
g__Oscillibacter	Physical activity (h/w)	0.0142712	0.952409	0.980637
g__RF39	Physical activity (h/w)	0.0697868	0.863315	0.980637
g__Roseburia	Physical activity (h/w)	-0.0321972	0.886533	0.980637
g__UCG-005	Physical activity (h/w)	0.127113	0.671325	0.958836
Coefficients from the generalized linear model using MaAsLin2, adjusting for age, T2D diagnosis, use of glucose-, lipid- and blood pressure-lowering drugs, and random technical covariates (extraction kit and sequencing pool). q-values were calculated using FDR correction. TG, Triglicerydes; C-HDL, High-Density Lipoprotein Cholesterol; SBP, Systolic Blood Pressure; DBP, Diastolic Blood Pressure; W…
